# Supplementary material
Source: PubMed Central journal article supplement (PMC10857032)
Supplement: Supplementary_Table_1.pdf [file Supplementary_Table_1.pdf]

**Supplementary Table 1.** Allele frequencies of AIMs in ancestral and study populations.

| Chr. | Name    | dbSNP      | Allele | Ancestral populations <sup>a</sup> |             |         | Study population |       |          |
|------|---------|------------|--------|------------------------------------|-------------|---------|------------------|-------|----------|
|      |         |            |        | European                           | N. American | African | Total            | Cases | Controls |
| 1    | MID1752 | rs2307948  | Ins    | 0.290                              | 0.920       | 0.560   | 0.57             | 0.58  | 0.57     |
| 1    | FYNULL  | rs2814778  | T      | 0.998                              | 1.000       | 0.001   | 0.93             | 0.92  | 0.93     |
| 1    | AT3     | rs3138521  | Ins    | 0.282                              | 0.061       | 0.858   | 0.23             | 0.26  | 0.21     |
| 1    | MID1386 | rs2307582  | Ins    | 0.730                              | 0.070       | 0.770   | 0.63             | 0.64  | 0.61     |
| 3    | MID921  | rs1611004  | Ins    | 0.090                              | 0.060       | 0.690   | 0.11             | 0.10  | 0.11     |
| 4    | GCF     | rs7041     | T      | 0.156                              | 0.339       | 0.853   | 0.50             | 0.49  | 0.50     |
| 4    | MID1586 | rs2307782  | Ins    | 0.420                              | 0.260       | 0.960   | 0.43             | 0.43  | 0.44     |
| 4    | MID52   | rs16344    | Ins    | 0.840                              | 0.140       | 0.740   | 0.60             | 0.60  | 0.60     |
| 5    | MID817  | rs1610901  | Ins    | 0.650                              | 0.130       | 0.960   | 0.62             | 0.65  | 0.60     |
| 5    | MID1039 | rs2067128  | Ins    | 0.270                              | 0.830       | 0.980   | 0.55             | 0.55  | 0.55     |
| 5    | MID1358 | rs2307554  | Ins    | 0.060                              | 0.040       | 0.800   | 0.22             | 0.23  | 0.22     |
| 5    | MID856  | rs1610941  | Ins    | 0.150                              | 0.690       | 0.660   | 0.33             | 0.30  | 0.35     |
| 5    | MID944  | rs1611027  | Ins    | 0.390                              | 0.950       | 0.890   | 0.65             | 0.63  | 0.67     |
| 6    | MID108  | rs16395    | Ins    | 0.320                              | 0.040       | 0.580   | 0.38             | 0.41  | 0.37     |
| 6    | MID472  | rs140761   | Ins    | 0.810                              | 0.420       | 0.910   | 0.73             | 0.73  | 0.73     |
| 6    | MD2062  | rs2308254  | Ins    | 0.290                              | 0.930       | 0.410   | 0.55             | 0.55  | 0.55     |
| 7    | MID1066 | rs2067155  | Ins    | 0.280                              | 0.260       | 0.840   | 0.39             | 0.40  | 0.39     |
| 8    | LPL     | rs285      | C      | 0.492                              | 0.442       | 0.971   | 0.50             | 0.51  | 0.49     |
| 11   | MID1780 | rs2307976  | Ins    | 0.230                              | 0.690       | 0.740   | 0.42             | 0.41  | 0.42     |
| 11   | DRD2    | rs1800498  | C      | 0.670                              | 0.045       | 0.135   | 0.45             | 0.44  | 0.46     |
| 11   | APOA1   | rs3138522  | Ins    | 0.925                              | 0.977       | 0.420   | 0.92             | 0.92  | 0.93     |
| 12   | MID1723 | rs2307919  | Ins    | 0.180                              | 0.150       | 0.900   | 0.33             | 0.34  | 0.32     |
| 13   | RB2300  | rs2252544  | G      | 0.315                              | 0.175       | 0.926   | 0.30             | 0.32  | 0.29     |
| 13   | MID2264 | rs34122827 | Ins    | 0.300                              | 1.000       | 1.000   | 0.62             | 0.60  | 0.64     |
| 13   | MID2269 | rs34905445 | Ins    | 0.400                              | 0.900       | 0.900   | 0.60             | 0.61  | 0.60     |
| 15   | OCA2    | rs1800404  | G      | 0.746                              | 0.488       | 0.115   | 0.57             | 0.57  | 0.57     |
| 16   | MID818  | rs1610902  | Ins    | 0.780                              | 0.980       | 0.090   | 0.79             | 0.78  | 0.80     |
| 16   | PV92    | rs3138523  | Ins    | 0.152                              | 0.792       | 0.225   | 0.45             | 0.42  | 0.48     |
| 19   | SB19.3  | rs3138524  | Ins    | 0.903                              | 0.645       | 0.415   | 0.79             | 0.80  | 0.79     |
| 20   | MID154  | rs16434    | Ins    | 0.250                              | 0.140       | 0.820   | 0.40             | 0.41  | 0.38     |

Chr.: Chromosome; N. American: Native American; Ins: Insertion; <sup>a</sup> Frequencies from panels for Latino populations reported by Parra,<sup>23</sup> Shriver,<sup>24</sup> and Molokhia.<sup>25</sup>
